# Supplementary material for: Pediatric reference interval verification for 16 biochemical markers on the Alinity ci system in the CALIPER cohort of healthy children and adolescents
Source: publisher site journal article supplement (doi:10.1515/cclm-2023-0256), 2023-04-28
Supplement: Supplementary file 1 [file j_cclm-2023-0256_suppl_001.docx]

**Supplemental Table 1**. Analytical assay information for biochemical parameters on the Abbott Alinity ci system.

|  |  | **Alinity** | | | **ARCHITECT** |
| --- | --- | --- | --- | --- | --- |
| **Assay** | **Unit** | **Reference Material/Method** | **Method** | **Analytical Measuring**  **Range** | **Analytical Measuring Range*** |
| Alpha-1-Antitrypsin | g/L | CRM 470 | Immunoturbidimetric | 0.25 to 2.00 | 0.25 to 3.00 |
| Alpha-1-Glycoprotein | g/L | CRM 470 | Immunoturbidimetric | 0.15 to 2.50 | 0.15 to 2.50 |
| Ceruloplasmin | mg/L | ERM DA470 | Immunoturbidimetric | 20 to HC | 20 to 4000 |
| Cholinesterase | U/L | ε Hexacyanoferrate (III)/ DGKC Butyrylthiocholine  Liquid/37°C | DGKC Butyrylthiocholine 37°C | 164 to 25 000 | 164 to 25 000 |
| Chloride | mmol/L | NIST/ Titration with Silver | Ion-selective electrode diluted (Indirect) | 50 to 150 | N/A |
| Complement C3 | g/L | ERM-DA470/ Reference method | Immunoturbidimetric | 0.11 to HC | 0.11 to HC |
| Complement C4 | g/L | ERM-DA470/ Reference method | Immunoturbidimetric | 0.029 to HC | 0.03 to HC |
| Glucose | mmol/L | NIST SRM 965/ ID-GC/MS | Enzymatic (Hexokinase/G-6-PDH) | 0.28 to 44.40 | N/A |
| Haptoglobin | g/L | ERM-DA470/ Reference method | Immunoturbidimetric | 0.08 to HC | 0.08 to HC |
| Immunoglobulin A | g/L | ERM-DA470/ Reference method | Immunoturbidimetric | 0.05 to HC | 0.05 to HC |
| Immunoglobulin E | IU/mL | WHO International Standard | Immunoturbidimetric | **AMR**: 28.4 to 1000  **EMI**:1000 to 10 000  **RI**: 15.7 to 10 000 | 25 to 1000 |
| Immunoglobulin G | g/L | ERM-DA470/ Reference method | Immunoturbidimetric | 1.09 to HC | 1.09 to HC |
| Immunoglobulin M | g/L | ERM-DA470/ Reference method | Immunoturbidimetric | 0.05 to HC | 0.05 to HC |
| Lactate | mmol/L | Reagent Grade Lactic Acid/ Titration | Lactic Acid to Pyruvate | 0.17 to 13.32 | N/A |
| Potassium | mmol/L | NIST/ Flame photometry | Ion-selective electrode diluted (Indirect) | 1.0 to 10.0 | N/A |
| Sodium | mmol/L | NIST/ Flame photometry | Ion-selective electrode diluted (Indirect) | 100 to 200 | N/A |

HC: highest calibrator level, AMR: analytical measuring range (range of values that demonstrate acceptable performance for linearity, imprecision, and bias), EMI: extended measuring interval (extends from the upper limit of quantitation to the upper limit of quantitation x sample dilution), RI: reportable interval (extends from the lower limit of detection to the upper limit of EMI).

*extracted from: [ref 3 or 6] and/or Abbott Diagnostics historic manufacturer package inserts.

N/A: No Architect comparison included in this manuscript.

**Supplemental Table 2**. Analytical validation summary for biochemical parameters on the Abbott Alinity ci system.

|  | **Imprecision** | | **Linearity** | | | **Method Comparison** | | | |
| --- | --- | --- | --- | --- | --- | --- | --- | --- | --- |
| **Assay** | **QC Mean** | **QC CV (%)** | **Slope** | **Intercept** | **R2** | **n** | **Slope** | **Intercept** | **R** |
| Alpha-1-Antitrypsin (g/L) | **Level 1**: 0.99  **Level 2**: 1.29  **Level 3**: 1.56 | **Level 1**: 0.8  **Level 2**: 0.8  **Level 3**: 0.7 | 0.99 | 0.026 | 0.998 | 23 | 0.97 | 0.01 | 0.988 |
| Alpha-1-Glycoprotein (g/L) | **Level 1**: 0.51  **Level 2**: 0.69  **Level 3**: 0.84 | **Level 1**: 0.7  **Level 2**: 0.5  **Level 3**: 0.4 | 1.01 | 0.000 | 0.999 | 29 | 0.87 | 0.13 | 0.984 |
| Ceruloplasmin (mg/L) | **Level 1**: 218  **Level 2**: 280  **Level 3**: 340 | **Level 1**: 1.3  **Level 2**: 0.7  **Level 3**: 1.2 | - | - | - | 24 | 0.98 | 15.8 | 0.976 |
| Cholinesterase* (U/L) | **Level 1**: 5933  **Level 2**: 7777  **Level 3**: 9090 | **Level 1**: 0.4  **Level 2**: 0.4  **Level 3**: 0.4 | 1.00 | 128 | 0.999 | 6 | 0.98 | -314 | 1.000 |
| Complement C3 (g/L) | **Level 1**: 0.90  **Level 2**: 1.34  **Level 3**: 1.67 | **Level 1**: 1.3  **Level 2**: 0.8  **Level 3**: 0.8 | 0.99 | 0.011 | 0.998 | 29 | 1.07 | -0.01 | 0.995 |
| Complement C4 (g/L) | **Level 1**: 0.17  **Level 2**: 0.24  **Level 3**: 0.30 | **Level 1**: 2.9  **Level 2**: 2.2  **Level 3**: 1.9 | 1.00 | 0.001 | 1.000 | 27 | 1.05 | 0.00 | 0.991 |
| Glucose (mmol/L) | **Level 1**: 2.80  **Level 2**: 6.90  **Level 3**: 14.6 | **Level 1**: 1.1  **Level 2**: 0.8  **Level 3**: 0.9 | 1.00 | 0.458 | 0.999 | 40 | 0.98 | -0.93 | 0.995 |
| Haptoglobin (g/L) | **Level 1**: 0.77  **Level 2**: 1.03  **Level 3**: 1.23 | **Level 1**: 1.0  **Level 2**: 0.8  **Level 3**: 0.8 | 0.99 | 0.011 | 0.998 | 26 | 1.02 | 0.00 | 0.999 |
| Immunoglobulin A (g/L) | **Level 1**: 1.56  **Level 2**: 2.20  **Level 3**: 2.74 | **Level 1**: 1.4  **Level 2**: 1.0  **Level 3**: 1.0 | 0.99 | 0.032 | 0.999 | 24 | 1.04 | -0.03 | 0.999 |
| Immunoglobulin E (IU/mL) | **Level 1**: 70.6  **Level 2:** 445.8 | **Level 1**: 3.3  **Level 2:** 0.9 | 1.01 | 5.35 | 0.998 | 36 | 0.80 | 5.32 | 0.982 |
| Immunoglobulin G (g/L) | **Level 1**: 7.16  **Level 2**: 10.3  **Level 3**: 12.9 | **Level 1**: 1.2  **Level 2**: 0.9  **Level 3**: 1.0 | 1.00 | 0.201 | 0.998 | 24 | 1.07 | -0.03 | 0.999 |
| Immunoglobulin M (g/L) | **Level 1**: 0.61  **Level 2**: 0.88  **Level 3**:1.14 | **Level 1**: 1.6  **Level 2**: 1.0  **Level 3**: 1.4 | 1.00 | 0.004 | 1.000 | 21 | 1.00 | 0.00 | 0.999 |
| Lactate (mmol/L) | **Level 1**: 1.01  **Level 2**: 1.89  **Level 3**: 6.67 | **Level 1**: 1.7  **Level 2**: 0.5  **Level 3**:0.4 | 1.00 | 0.159 | 0.998 | 36 | 0.99 | 0.09 | 1.000 |
| Chloride (mmol/L) | **Level 1**: 79  **Level 2**: 95  **Level 3**: 108 | **Level 1**: 0.6  **Level 2**: 0.6  **Level 3**: 0.4 | - | - | - | 39 | 1.11 | -12.5 | 0.935 |
| Potassium (mmol/L) | **Level 1**: 2.8  **Level 2**: 4.0  **Level 3**: 6.3 | **Level 1**: 1.4  **Level 2**: 0.8  **Level 3**: 0.8 | - | - | - | 39 | 1.05 | 0.14 | 0.927 |
| Sodium (mmol/L) | **Level 1**: 117  **Level 2**: 146  **Level 3**: 160 | **Level 1**: 0.8  **Level 2**: 0.5  **Level 3**: 0.5 | - | - | - | 39 | 1.00 | -3 | 0.832 |

- not completed; method comparison statistics used ARCHITECT values as reference method; * low sample size due to lack of comparator samples.

**Supplemental Table 3.** Example calculation of percent verification within reference limits and confidence limits.

|  | **Lower Limit** | **Lower Limit 90% Confidence Intervals** | **Upper Limit** | **Upper Limit 90% Confidence Intervals** |
| --- | --- | --- | --- | --- |
| **Variables** | X | (A, B) | Y | (C,D) |
| **Calculation of Percent Verification Within CALIPER ARCHITECT Reference Limits** | **= [number of samples falling within X and Y]/total number of samples** | | | |
| **Calculation of Percent Verification Within CALIPER ARCHITECT Confidence Limits** | **= [number of samples falling within A and D]/total number of samples** | | | |
