# Supplementary material for: Pediatric reference interval verification for 16 biochemical markers on the Alinity ci system in the CALIPER cohort of healthy children and adolescents
Source: publisher site journal article supplement (doi:10.1515/cclm-2023-0256), 2023-04-28
Supplement: Supplementary file 1 [file j_cclm-2023-0256_suppl_002.pdf]

**A.****Alpha-1AT**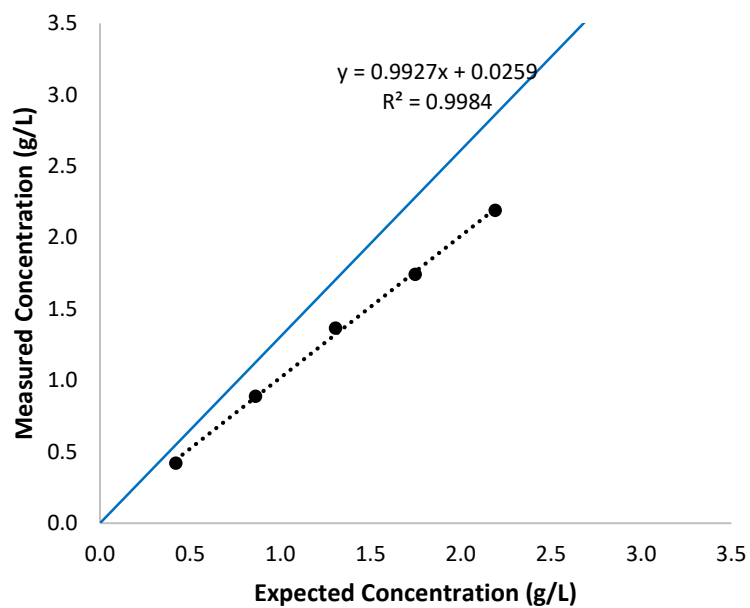**B.****Alpha-GP**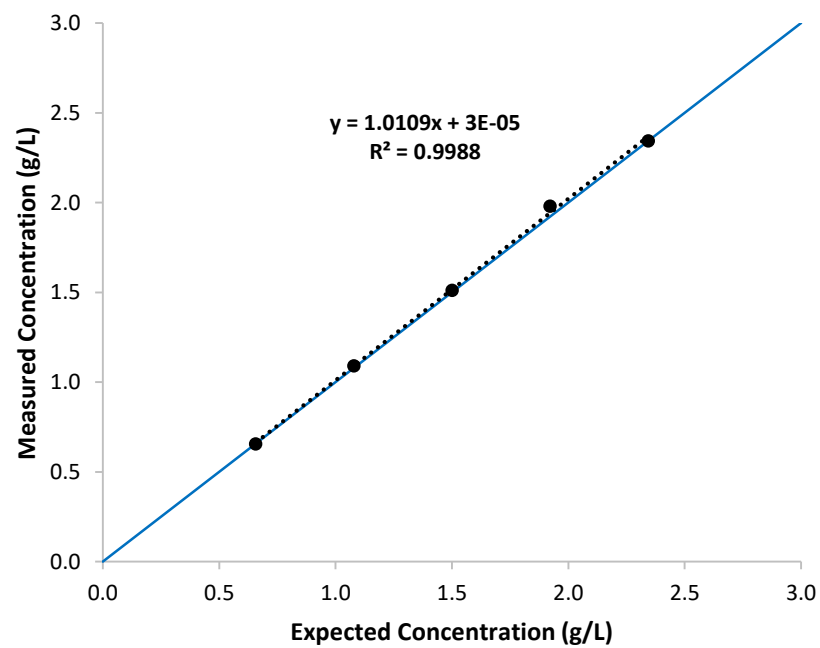**C.****Lactate**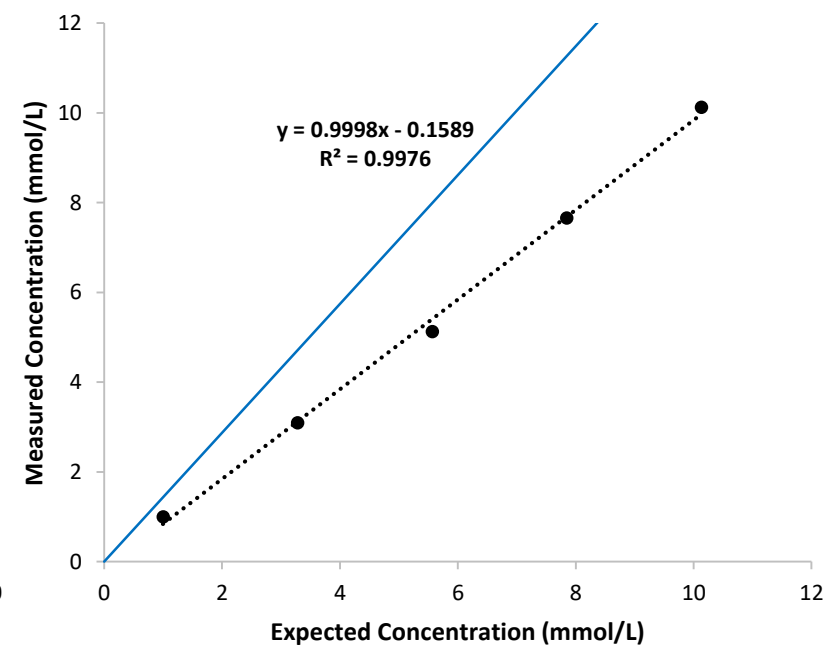

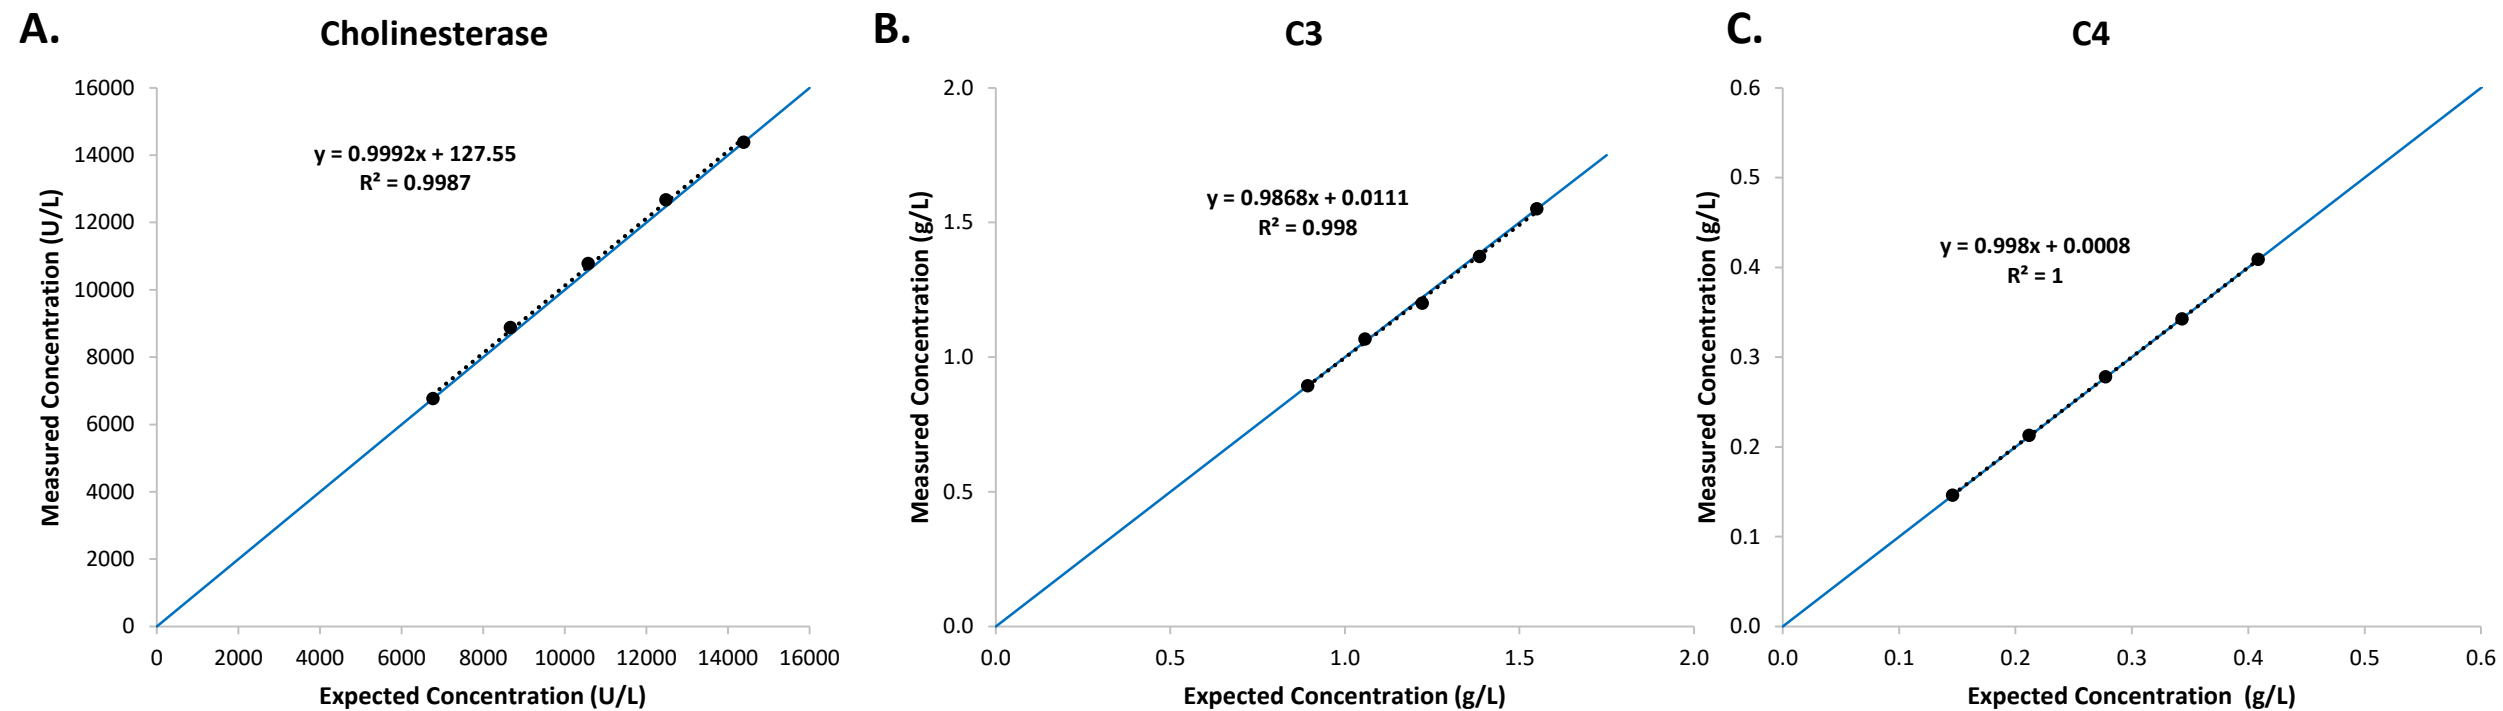

**Supplemental Figure 2:** Assay linearity measured using five-part linearity dilution series. All data points are presented as the average of triplicate measurements. Line of best fit was determined by Deming regression for **A)** cholinesterase, **B)** complement 3, **C)** complement 4.

**A.****Glucose**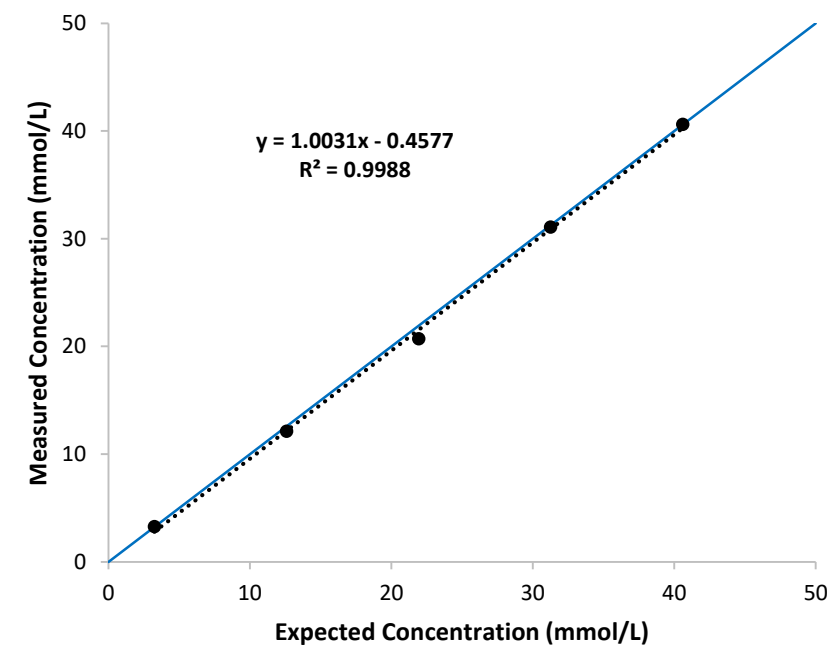**B.****Haptoglobin**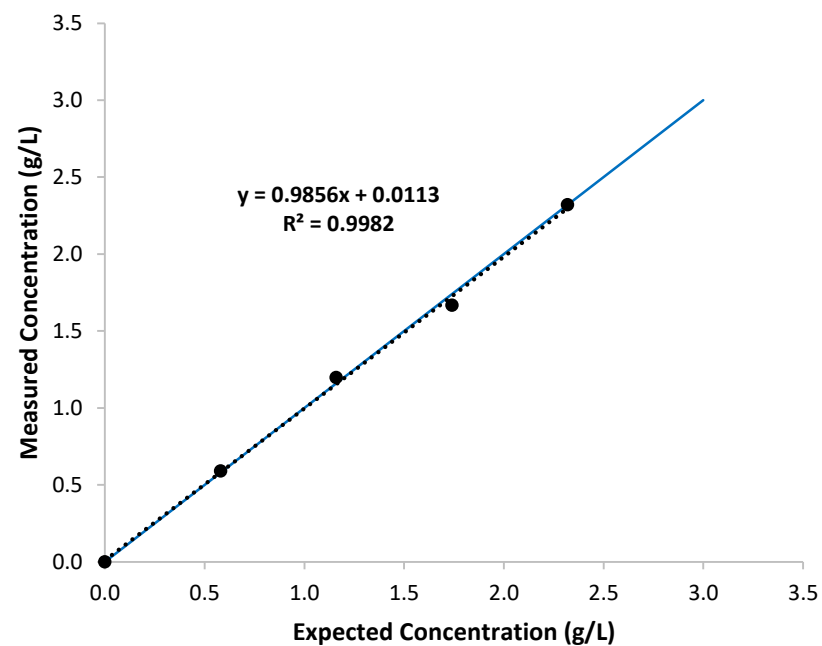**C.****IgA**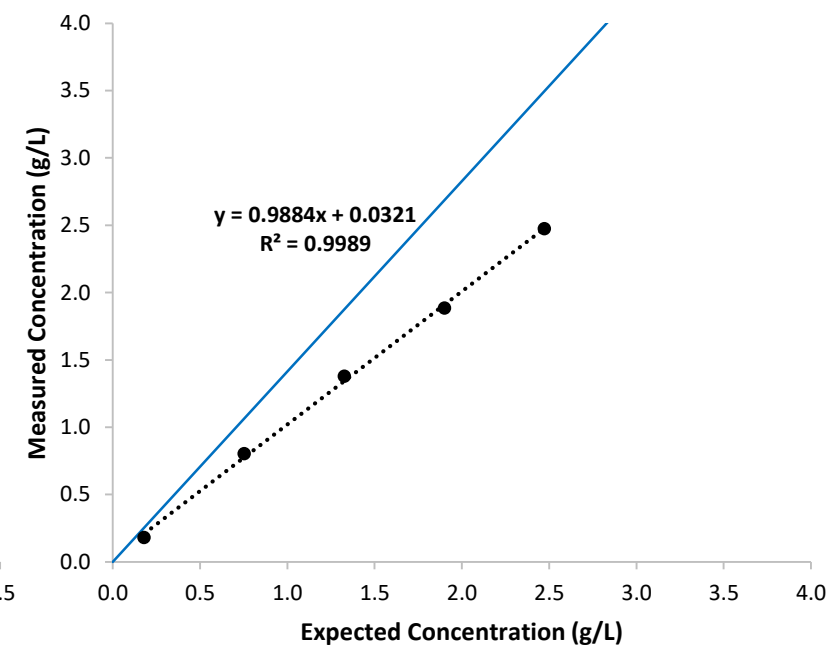

**A.**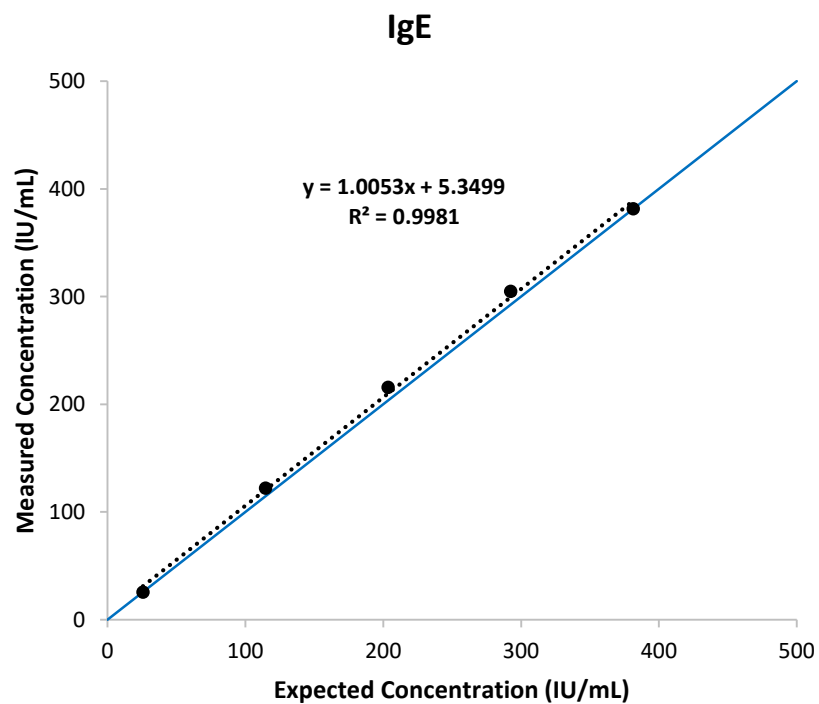**B.**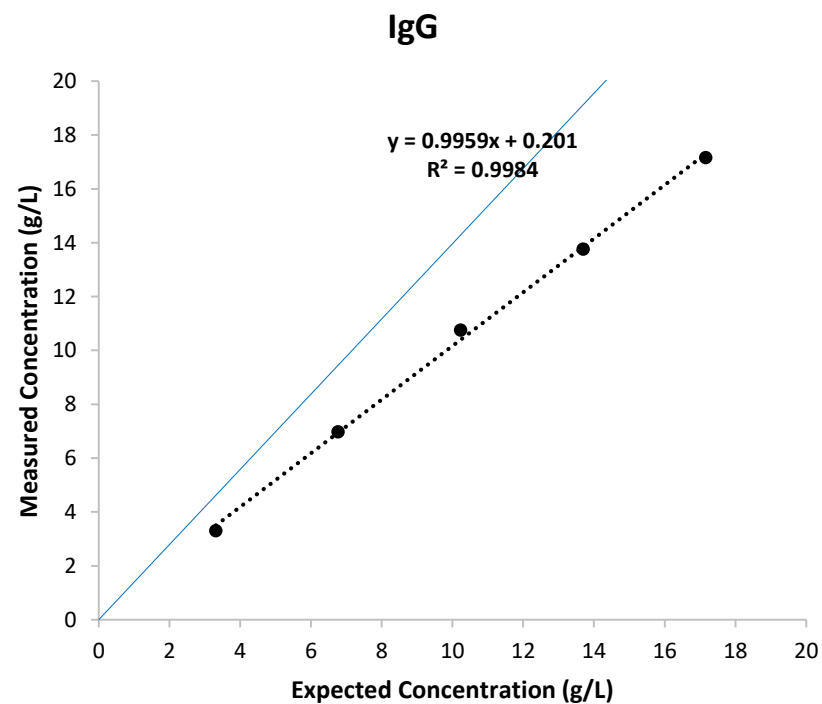**C.**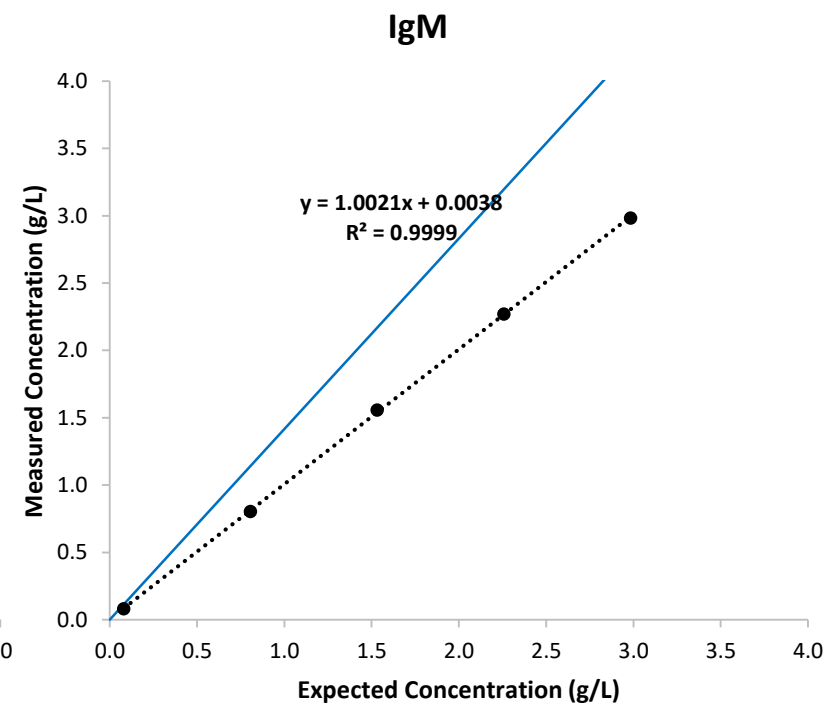

**Supplemental Figure 4:** Assay linearity measured using five-part linearity dilution series. All data points are presented as the average of triplicate measurements. Line of best fit was determined by Deming regression for **A)** immunoglobulin E, **B)** immunoglobulin G, **C)** immunoglobulin M

**A.****Alpha-1AT**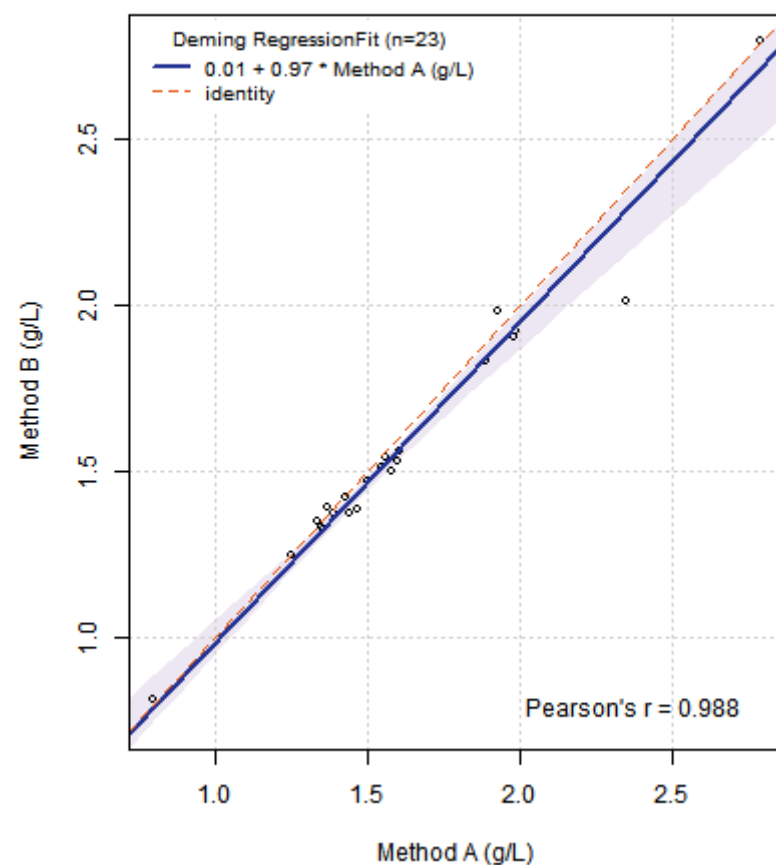**B.****A1GP**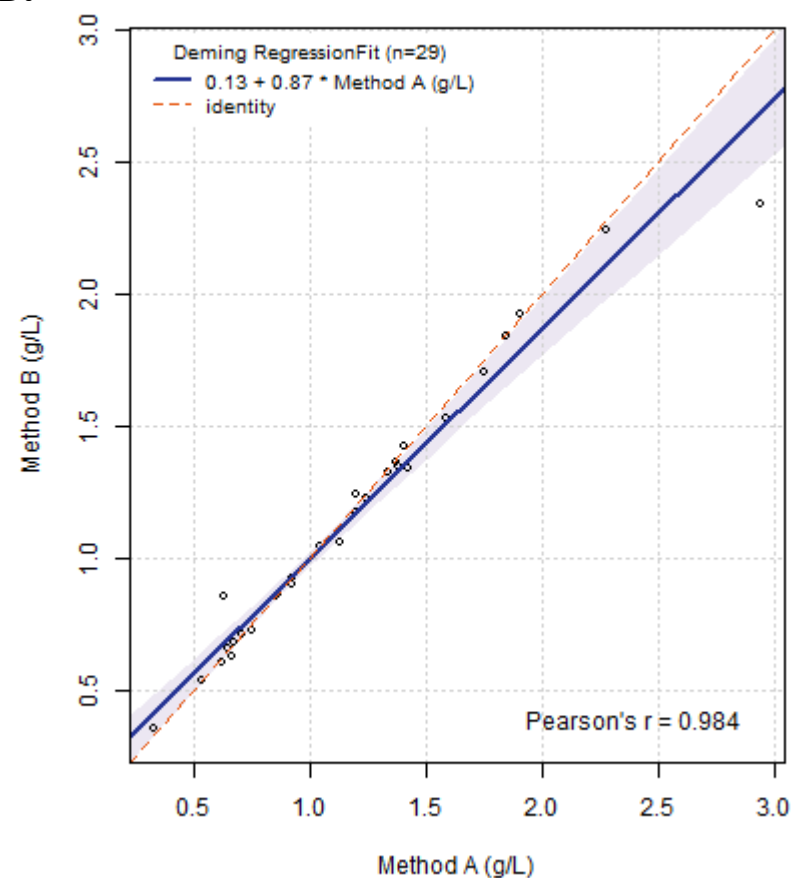**C.****Ceruloplasmin**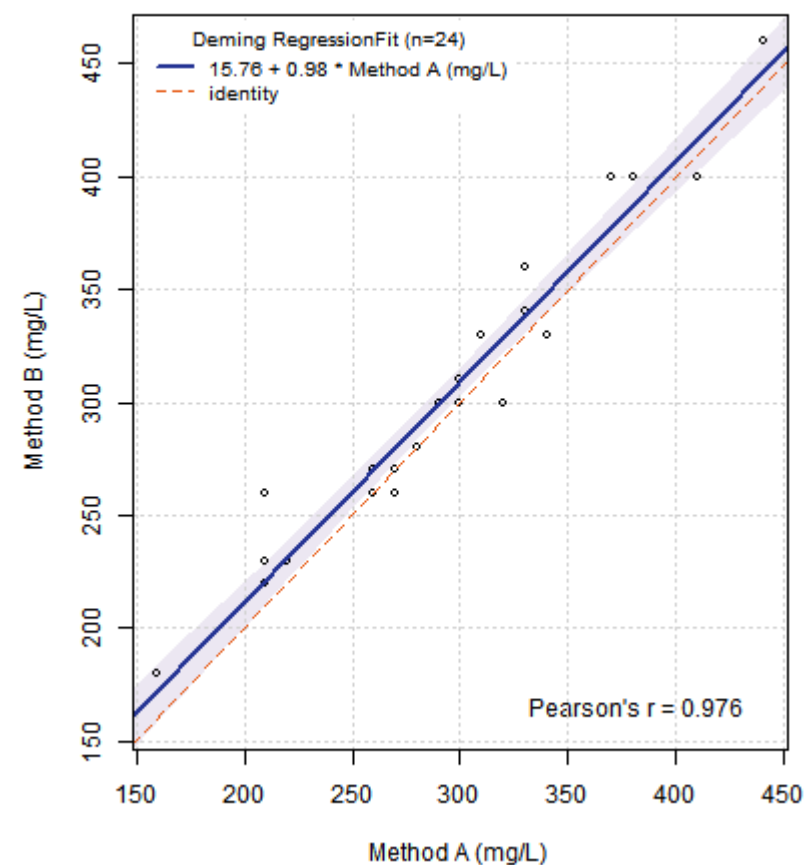

**Supplemental Figure 5:** Method comparison analysis for assays measured by Abbott ARCHITECT (x-axis) and Alinity (y-axis) systems. The dashed red line indicates the line of perfect agreement ( $y=x$ ) and the solid blue line indicates the Deming regression line. **A)** Alpha-1-antitrypsin, **B)** Alpha-1-glycoprotein, **C)** Ceruloplasmin.

**A.****Cholinesterase**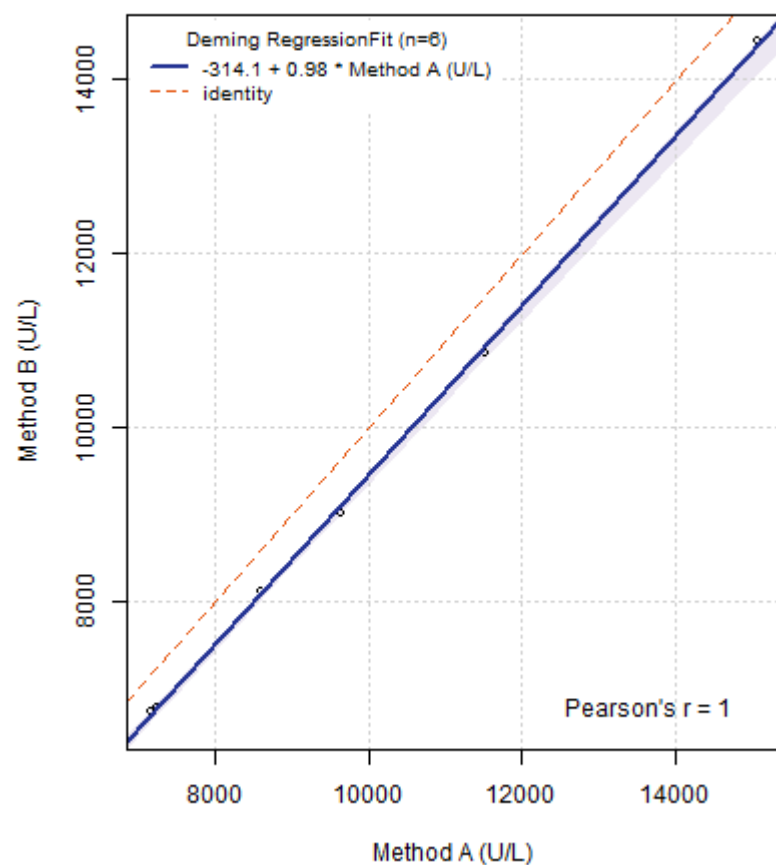**B.****C3**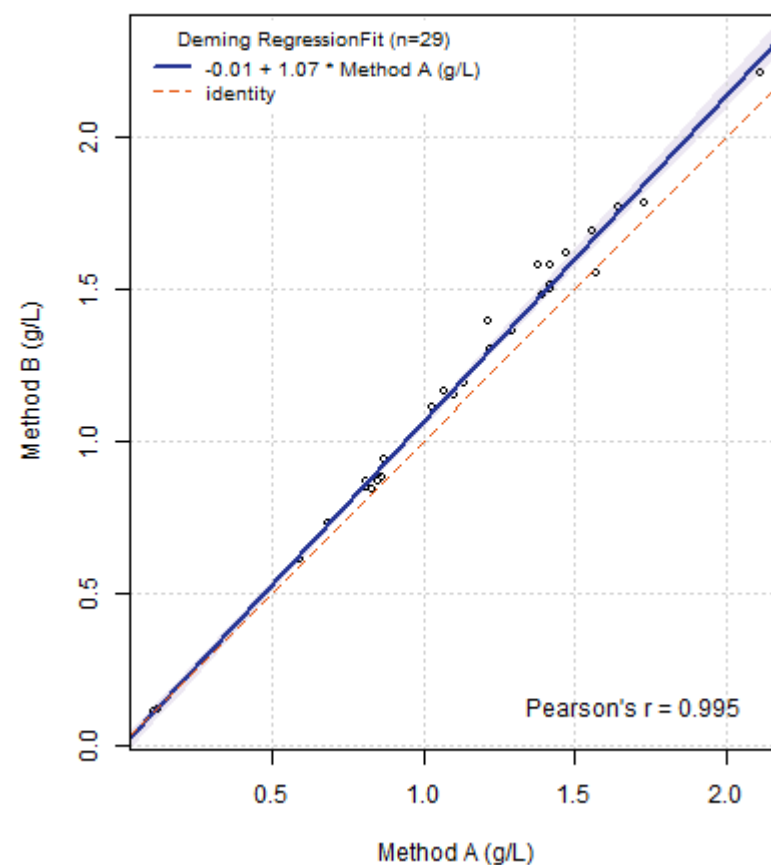**C.****C4**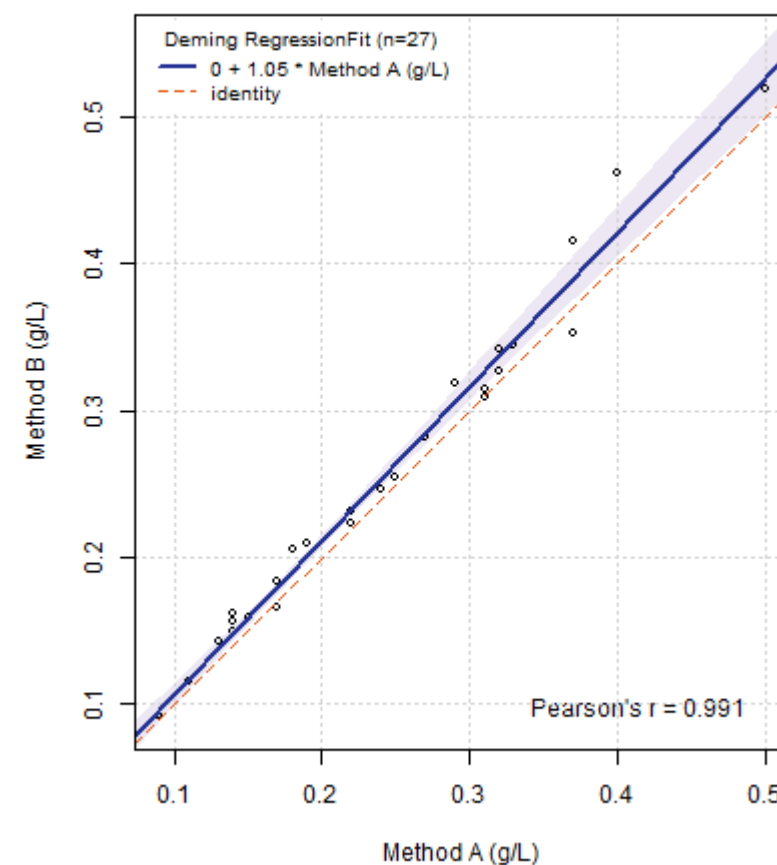

**Supplemental Figure 6:** Method comparison analysis for assays measured by Abbott ARCHITECT (x-axis) and Alinity (y-axis) systems. The dashed red line indicates the line of perfect agreement ( $y=x$ ) and the solid blue line indicates the Deming regression line. **A)** cholinesterase, **B)** complement C3, **C)** complement C4.

**A.****Glucose**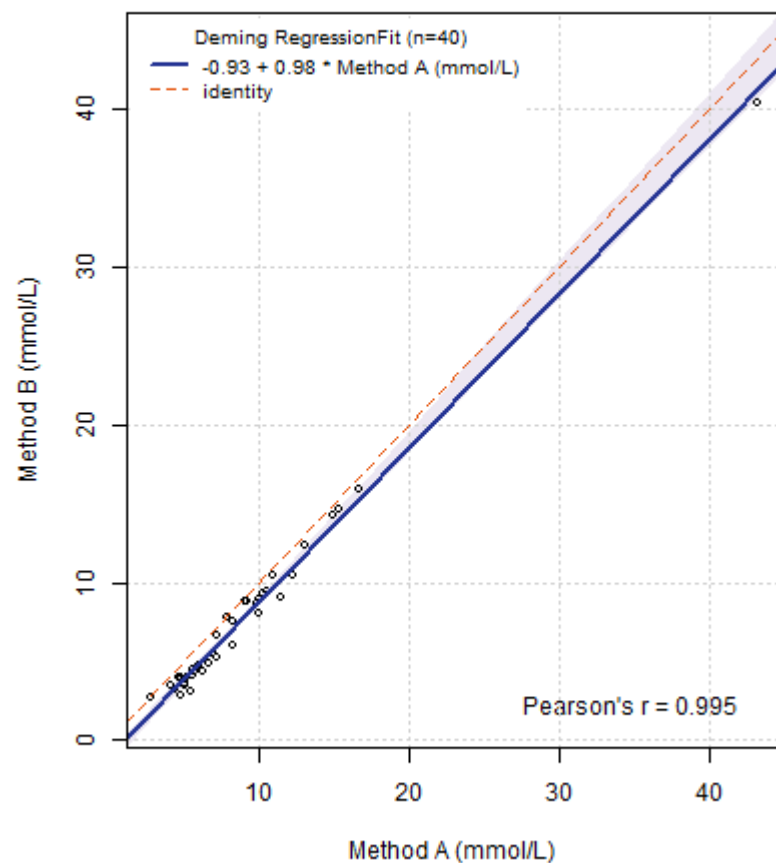**B.****Haptoglobin**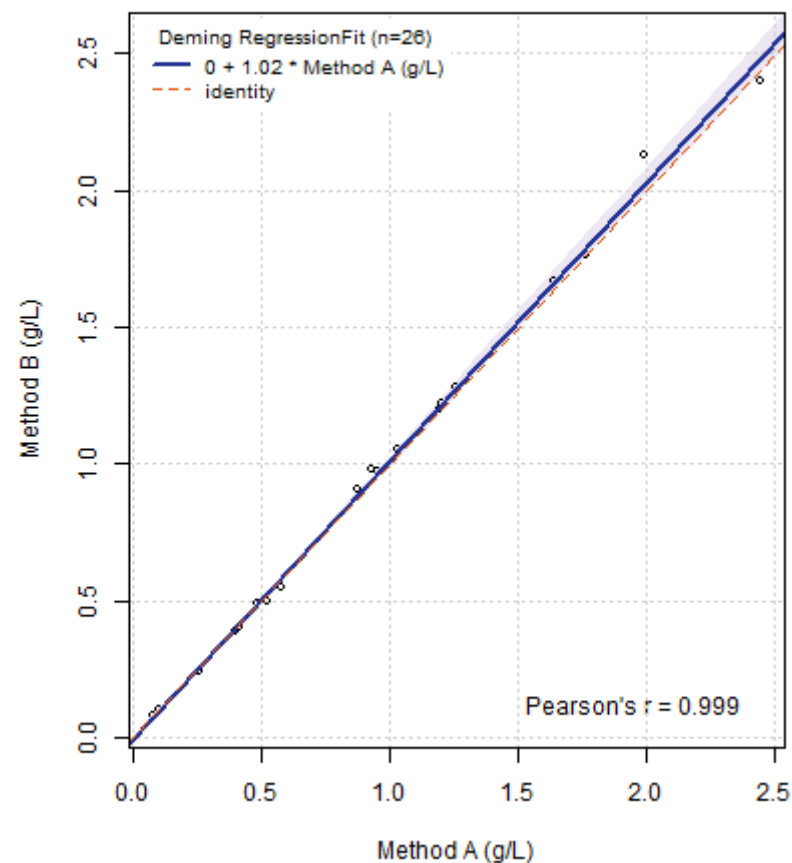**C.****IgA**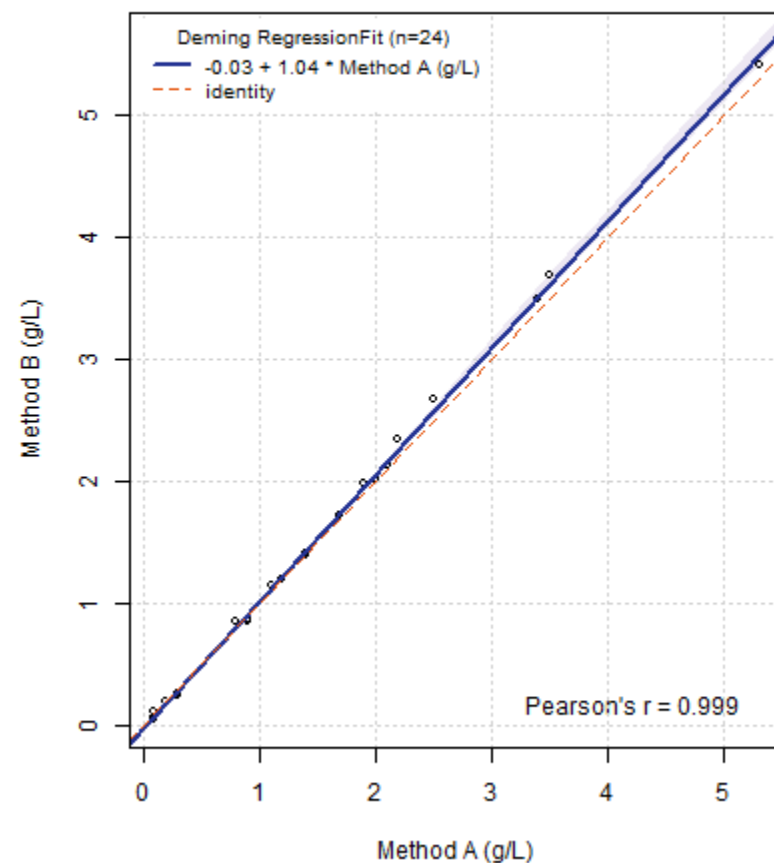

**Supplemental Figure 7:** Method comparison analysis for assays measured by Abbott ARCHITECT (x-axis) and Alinity (y-axis) systems. The dashed red line indicates the line of perfect agreement ( $y=x$ ) and the solid blue line indicates the Deming regression line. **A)** glucose, **B)** haptoglobin, **C)** immunoglobulin A.

**A.****IgE**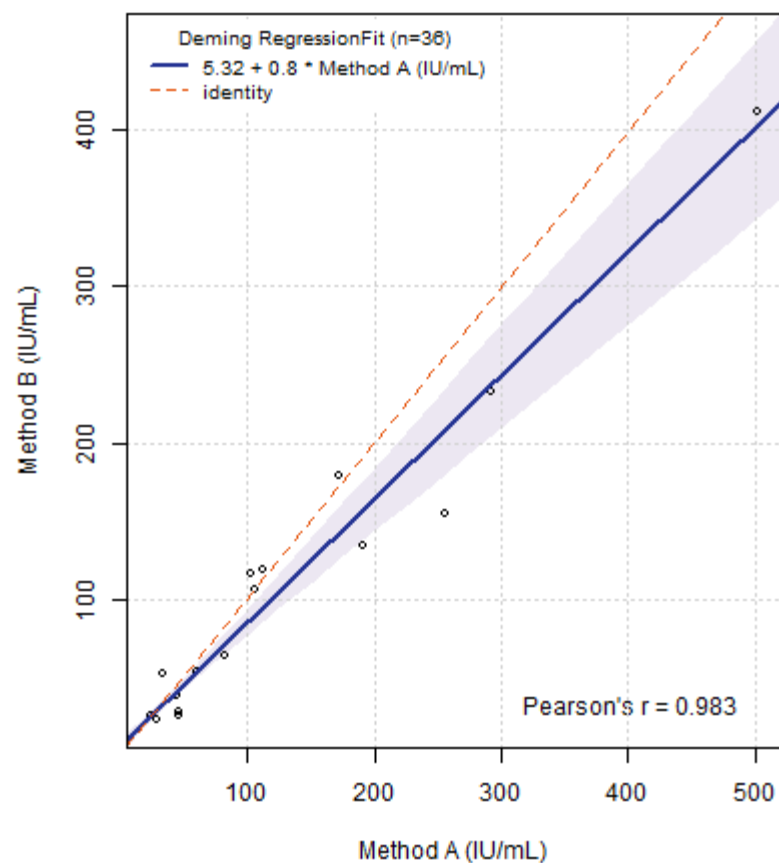**B.****IgG**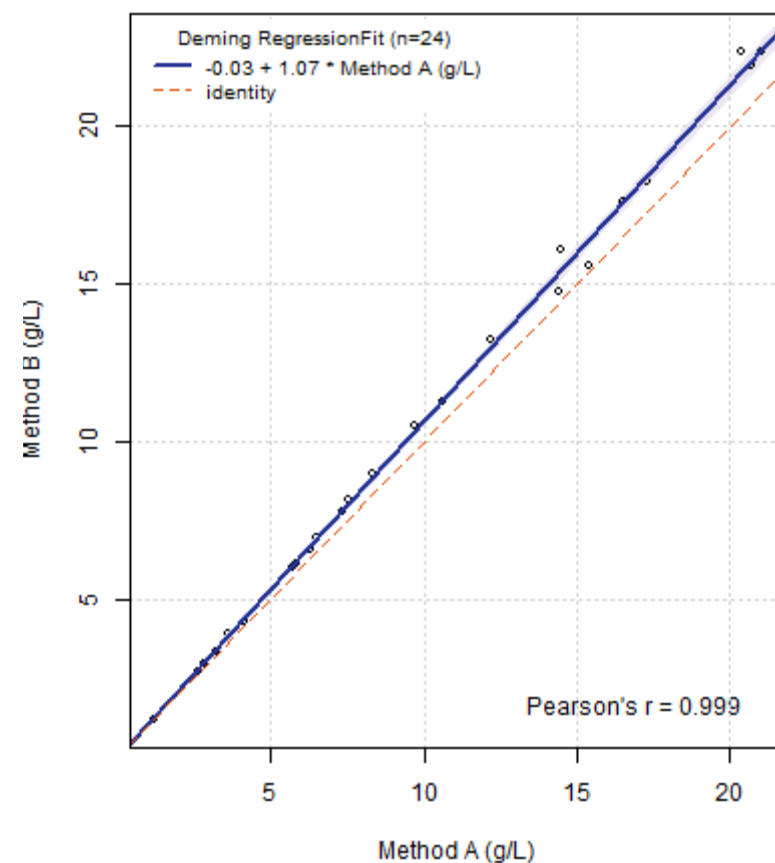**C.****IgM**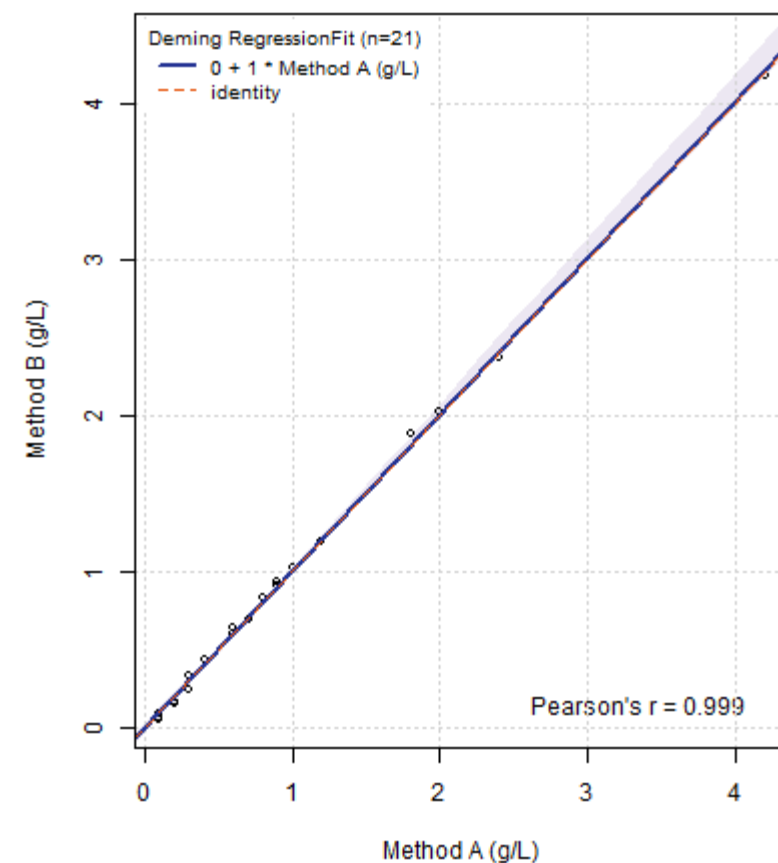

**Supplemental Figure 8:** Method comparison analysis for assays measured by Abbott ARCHITECT (x-axis) and Alinity (y-axis) systems. The dashed red line indicates the line of perfect agreement ( $y=x$ ) and the solid blue line indicates the Deming regression line. **A)** immunoglobulin E, **B)** immunoglobulin G, **C)** immunoglobulin M.



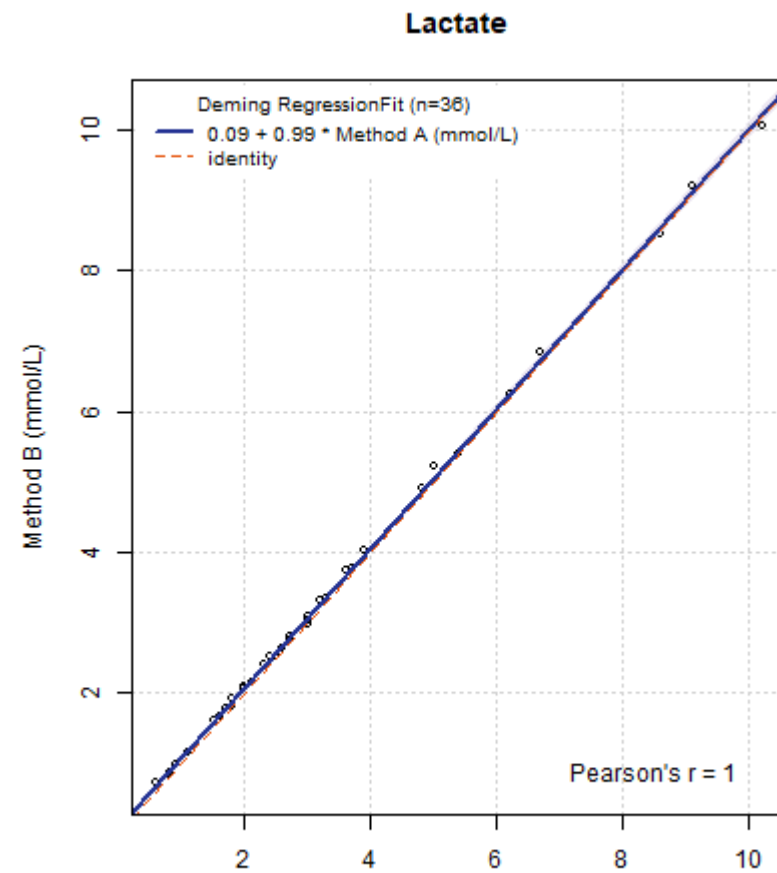

**Supplemental Figure 9:** Method comparison analysis for lactate measured by Abbott ARCHITECT (x-axis) and Alinity (y-axis) systems. The dashed red line indicates the line of perfect agreement ( $y=x$ ) and the solid blue line indicates the Deming regression line.

**A.****Chloride**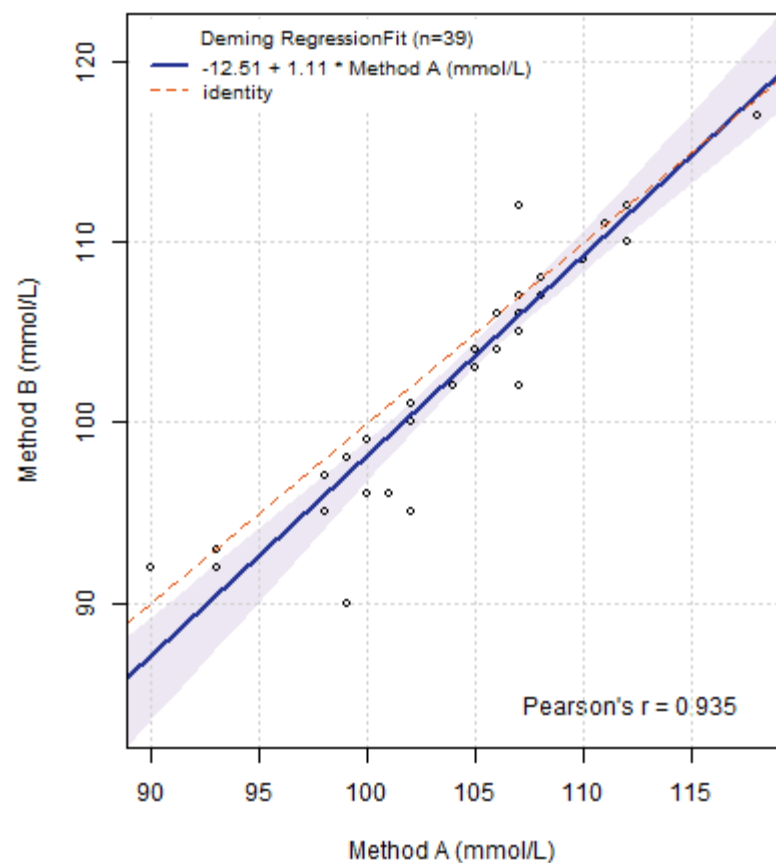**B.****Potassium**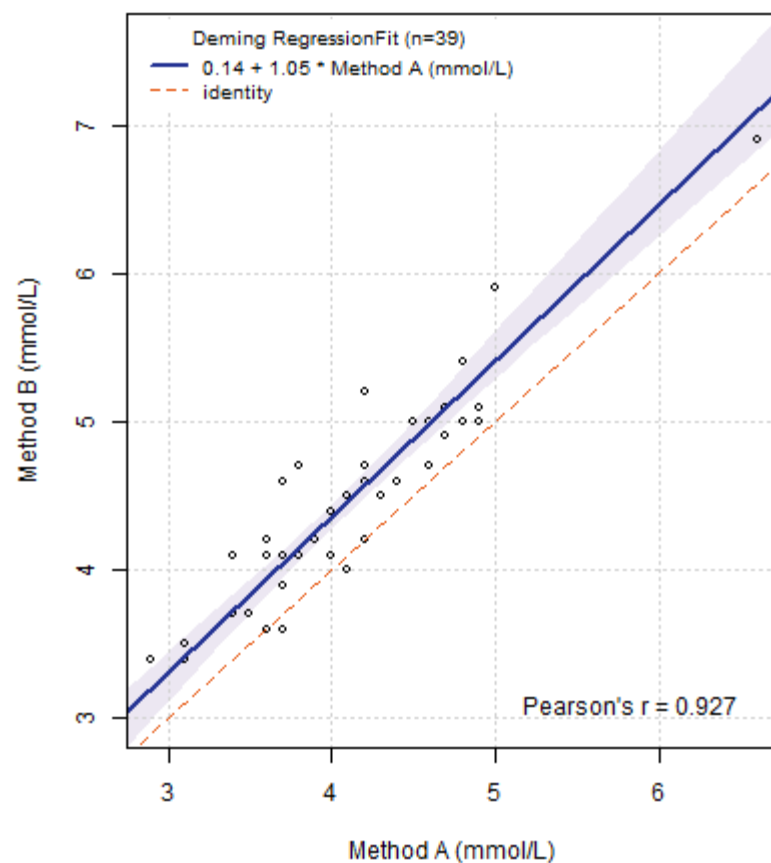**C.****Sodium**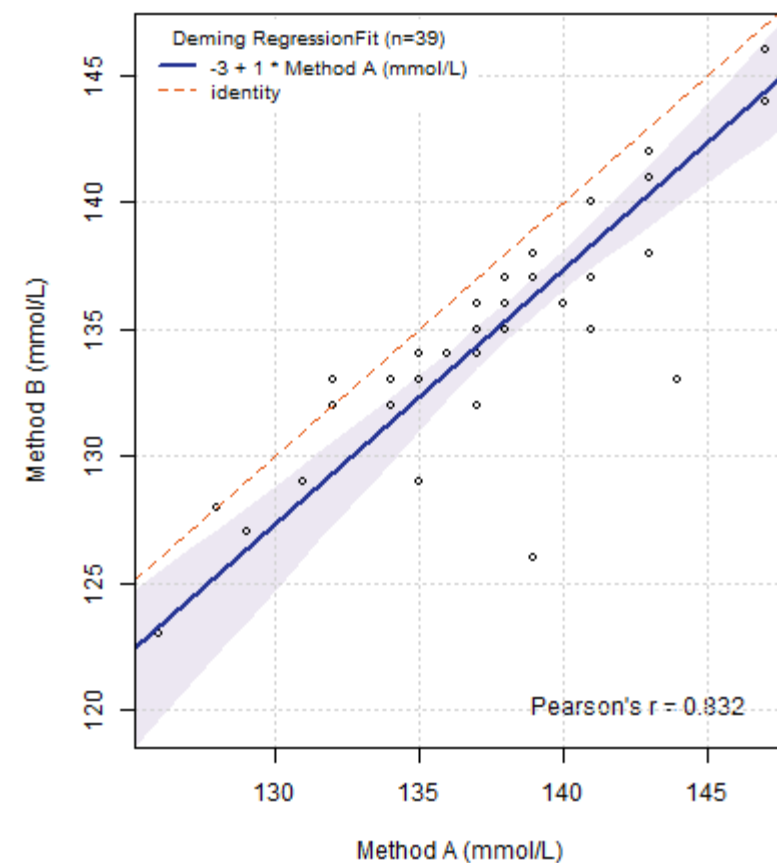

**Supplemental Figure 10:** Method comparison analysis for electrolytes measured by Abbott ARCHITECT (x-axis) and Alinity (y-axis) systems. The dashed red line indicates the line of perfect agreement ( $y=x$ ) and the solid blue line indicates the Deming regression line. **A)** Chloride, **B)** Potassium, **C)** Sodium
